# Supplementary material for: Actomyosin contractility provokes contact inhibition in E-cadherin-ligated keratinocytes
Source: PubMed Central journal article supplement (PMC5390311; doi:10.1038/srep46326), 2017-04-13

# **Actomyosin contractility provokes contact inhibition in E-cadherin-ligated keratinocytes**

Hiroaki Hirata, Mikhail Samsonov and Masahiro Sokabe

## **Supplementary Information**

### **Supplementary Figure Legends**

**Supplementary Figure S1. Effects of inhibition of Rho kinase and myosin II on proliferation and cytokinesis in confluent keratinocytes.** (a) Confluent HaCaT cells cultured for 40 h were incubated with EdU for 2 h and then stained for nuclei (Hoechst) and cyclin E. Scale bar, 50  $\mu$ m. (b) Confluent HaCaT cells cultured for 40 h were treated with 60  $\mu$ M Y-27632 or DMSO (for control) for 6 h, and then incubated with EdU for 2 h in the presence of Y-27632 or DMSO. The percentages of EdU positive cells are shown. \*,  $P < 0.01$ .  $n = 8$  (> 50 cells each) for each bar. (c) Time-lapse images of cytokinetic events in confluent HaCaT cells in the presence of either 100  $\mu$ M blebbistatin (Blebb) or DMSO (for control). Yellow arrows indicate the cells undergoing cytokinetic events. Note that the blebbistatin-treated cell failed to divide. Scale bar, 30  $\mu$ m. (d) Frequencies of cytokinetic events (including incomplete cell division) in confluent HaCaT cells in the presence of 100  $\mu$ M blebbistatin (Blebb) or DMSO (for control). Cell behaviors in the first 5 h of the time-lapse imaging were analyzed (see Methods). \*,  $P < 0.05$ .  $n = 3$  (> 130 cells in each) for each bar.

**Supplementary Figure S2. Time courses of progression of contact inhibition in HaCaT and MCF-10A cells.** (a and c) HaCaT (a) and MCF-10A (c) cells cultured for the indicated time after seeding the cells under the sparse and confluent conditions were incubated with EdU for 2 h. The percentages of EdU positive cells are shown. Each

point represents the mean  $\pm$  SD for  $n = 8$  ( $> 50$  cells each). **(b)** Confluent HaCaT cells cultured for 64 h after seeding the cells were treated with 100  $\mu$ M blebbistatin (Blebb) or DMSO (for control) for 6 h, and then incubated with EdU for 2 h in the presence of blebbistatin or DMSO. The percentages of EdU positive cells are shown. \*,  $P < 0.05$ .  $n = 8$  ( $> 50$  cells each) for each bar. **(d)** MCF-10A cells cultured for 40 h under the sparse and confluent conditions were treated with 100  $\mu$ M blebbistatin (Blebb) or DMSO (for control) for 6 h, and then incubated with EdU for 2 h in the presence of blebbistatin or DMSO. The percentages of EdU positive cells are shown. N.S., no significant difference.  $n = 8$  ( $> 50$  cells each) for each bar.

**Supplementary Figure S3. E-cadherin dependency of adherens junctions in confluent keratinocytes.** **(a)** Confluent HaCaT cells cultured for 40 h were treated with 100  $\mu$ M blebbistatin (Blebb) or DMSO (for control) for 6 h, and then stained for E-cadherin and F-actin. Apical, middle and basal focal planes of the cells are shown. A magnified and merged image of the boxed region (DMSO, apical) is also shown. Scale bars, 5  $\mu$ m for the magnified and merged image, and 10  $\mu$ m for others. **(b)** Confluent HaCaT cells cultured for 40 h were treated with 5  $\mu$ g/ml anti-E-cadherin inhibitory antibody (anti-Ecad) or control IgG for 6 h, and then stained for  $\beta$ -catenin and F-actin. Apical focal planes of the cells are shown. A magnified and merged image of the boxed region (IgG) is also shown. Scale bars, 5  $\mu$ m for the magnified and merged image, and 20  $\mu$ m for others.

**Supplementary Figure S4. Actomyosin dependency of adherens junctions in confluent HaCaT and MCF-10A cells.** HaCaT and MCF-10A cells cultured for 40 h

under the confluent condition were treated with 100  $\mu$ M blebbistatin (Blebb) or DMSO (for control) for 6 h, and then stained for  $\beta$ -catenin and F-actin. Apical, middle and basal focal planes of the cells are shown. Magnified and merged images of the boxed regions (DMSO, apical) are also shown. Scale bars, 10  $\mu$ m for the magnified and merged images, and 20  $\mu$ m for others.

**Supplementary Figure S5. Effects of enforced activation of RhoA on adherens junctions and cell proliferation in confluent MCF-10A cells.** (a and b) Confluent MCF-10A cells cultured for 40 h were treated with or without 5  $\mu$ g/ml CN03 for 6 h and then subjected to either immunostaining for  $\beta$ -catenin and F-actin (a) or the EdU incorporation assay (b). Apical, middle and basal focal planes of the cells are shown in (a). Scale bars, 20  $\mu$ m. The percentages of EdU positive cells are shown in (b). N.S., no significant difference.  $n = 8$  (> 50 cells each) for each bar.

**Supplementary Figure S6.  $\alpha$ -Catenin depletion increases nuclear accumulation of  $\beta$ -catenin and YAP.** (a) HaCaT cells expressing shRNA against  $\alpha$ -catenin (sh $\alpha$ Cat) or non-targeting shRNA (shContl) were cultured for 40 h under the confluent condition, and then stained for YAP, nuclei (Hoechst) and F-actin. Scale bar, 20  $\mu$ m. (b and c) The nuclear/cytoplasmic ratio of fluorescence intensities of  $\beta$ -catenin (b) or YAP (c) in confluent HaCaT cells expressing shRNA against  $\alpha$ -catenin (sh $\alpha$ Cat) or non-targeting shRNA (shContl). \*,  $P < 0.001$ .  $n = 20$  cells (in two independent experiments) for each bar.

**Supplementary Figure S7.  $\beta$ -Catenin depletion increases YAP nuclear**

**accumulation and cell proliferation in confluent keratinocytes.** (a) After culturing for 40 h, confluent HaCaT cells expressing either shRNA against  $\beta$ -catenin (sh $\beta$ Cat), shRNA against YAP1 (shYAP1) or non-targeting shRNA (shCont1) were lysed and immunoblotted for YAP,  $\beta$ -catenin and actin. (b) After culturing for 40 h, confluent HaCaT cells expressing either shRNA against  $\beta$ -catenin (sh $\beta$ Cat), shRNA against YAP1 (shYAP1) or non-targeting shRNA (shCont1) were treated with 100  $\mu$ M blebbistatin (Blebb) or DMSO (for control) for 6 h, and then incubated with EdU for 2 h in the presence of blebbistatin or DMSO. The percentages of EdU positive cells are shown. \*,  $P < 0.005$ ; N.S., no significant difference.  $n = 8$  ( $> 50$  cells each) for each bar. (c) Confluent HaCaT cells expressing shRNA against  $\beta$ -catenin (sh $\beta$ Cat) or non-targeting shRNA (shCont1) were cultured for 40 h, and then treated with 100  $\mu$ M blebbistatin (Blebb) or DMSO (for control) for 6 h. These cells were stained for YAP, nuclei (Hoechst) and F-actin. Scale bars, 30  $\mu$ m.

**Supplementary Figure S8. Localization of YAP and vinculin in sparse and confluent keratinocytes.** (a) Sparse and confluent HaCaT cells cultured for 40 h were treated with 100  $\mu$ M blebbistatin (Blebb) or DMSO (for control) for 6 h, and then stained for YAP, nuclei (Hoechst) and F-actin. Scale bars, 50  $\mu$ m. (b) Sparse and confluent HaCaT cells cultured for 40 h were stained for vinculin and F-actin. Scale bars, 20  $\mu$ m.

**Supplementary Figure S9. Effect of actomyosin inhibition on production of bi-nucleate cells.** (a) Confluent HaCaT cells cultured for 40 h were treated with 100  $\mu$ M blebbistatin (Blebb) or DMSO (for control) for 6 h, and then stained for nuclei

(Hoechst),  $\beta$ -catenin and F-actin. Bi-nucleate cells are indicated by arrows. Scale bar, 30  $\mu$ m. **(b)** The percentages of bi-nucleate cells in confluent HaCaT cells treated with 100  $\mu$ M blebbistatin (Blebb) or DMSO (for control) for 6 h. N.S., no significant difference.  $n = 8$  ( $> 30$  cells each) for each bar. **(c)** Time-lapse images of a HaCaT cell (yellow arrow) that underwent cell death after incomplete cell division in the presence of 100  $\mu$ M blebbistatin (Blebb). Scale bar, 30  $\mu$ m.

**Supplementary Video 1. Time-lapse images of DMSO-treated HaCaT cells under the confluent condition.** Confluent HaCaT cells cultured for 40 h after the cell seeding were pre-treated with DMSO for 6h, and then time-lapse imaging was conducted in the presence of DMSO. Phase contrast images captured at every 5 min for 35 h are shown at the speed of 25 frames per second.

**Supplementary Video 2. Time-lapse images of blebbistatin-treated HaCaT cells under the confluent condition.** Confluent HaCaT cells cultured for 40 h after the cell seeding were pre-treated with 100  $\mu$ M blebbistatin for 6h, and then time-lapse imaging was conducted in the presence of blebbistatin. Phase contrast images captured at every 5 min for 35 h are shown at the speed of 25 frames per second.

**Supplementary Video 3. Incomplete cell division followed by cell death in blebbistatin-treated HaCaT cells under the confluent condition.** Confluent HaCaT cells cultured for 40 h after the cell seeding were pre-treated with 100  $\mu$ M blebbistatin for 6h, and then time-lapse imaging was conducted in the presence of blebbistatin. Phase contrast images (captured at every 5 min for 13 h) of a cell undergoing

incomplete cell division followed by cell death are shown at the speed of 20 frames per second.

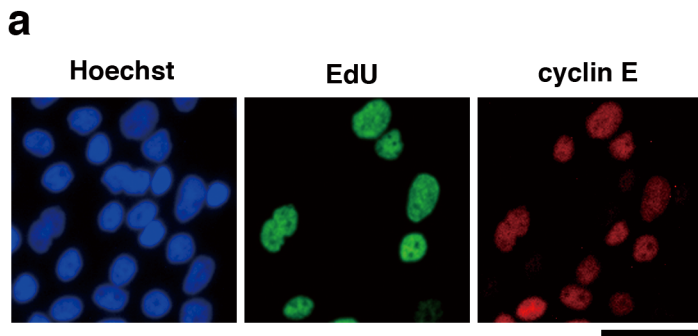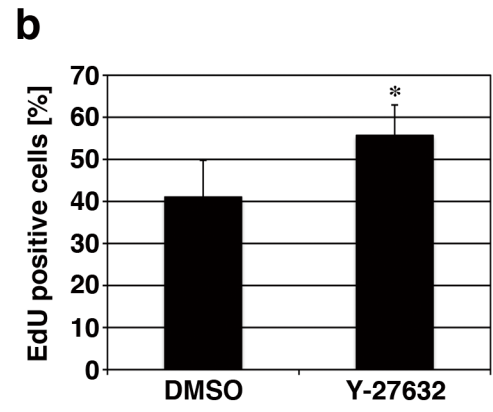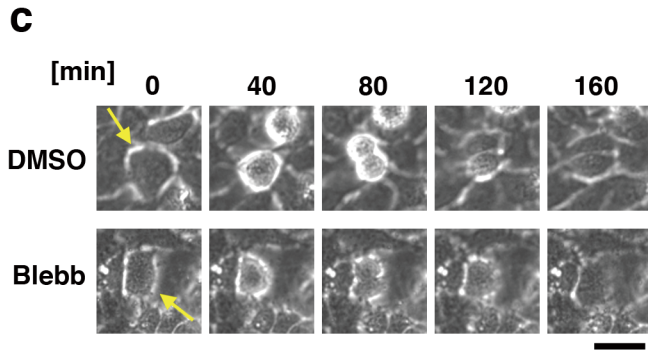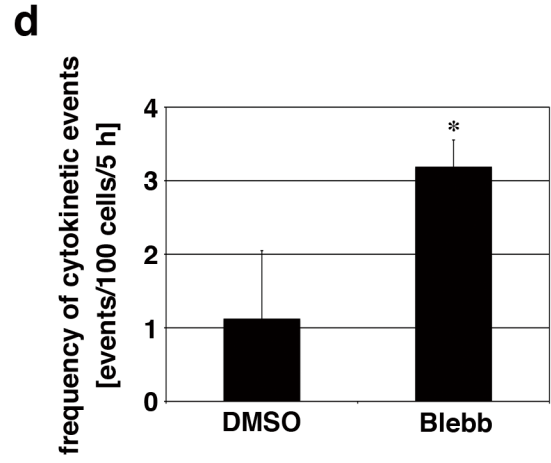

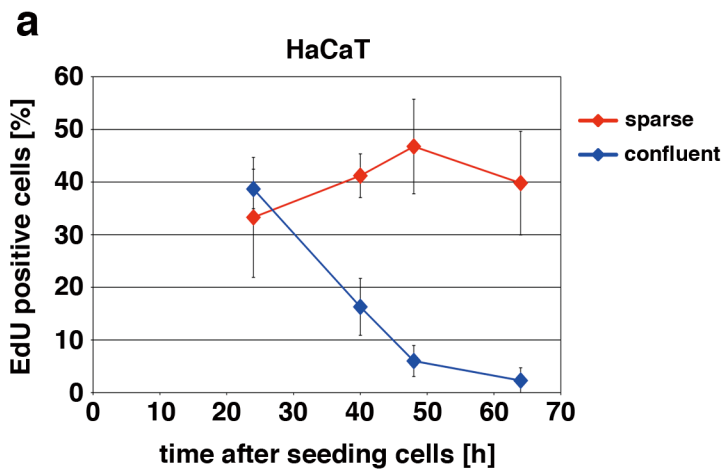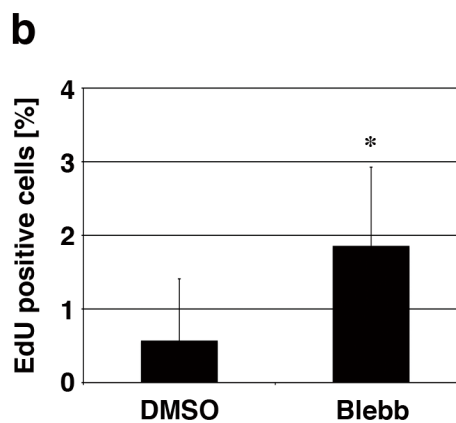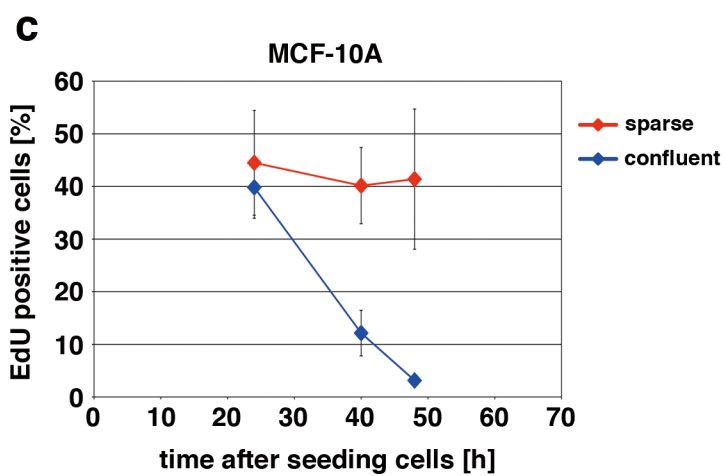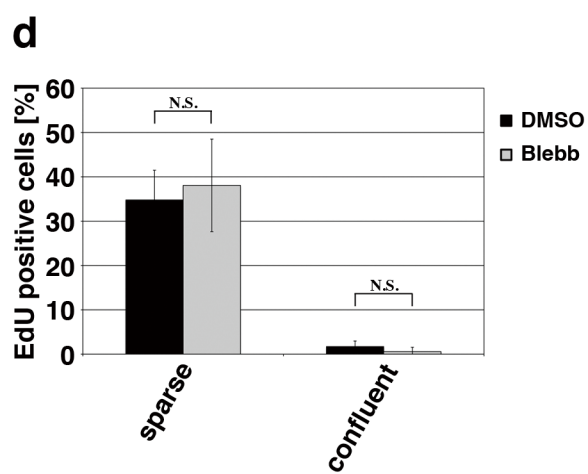



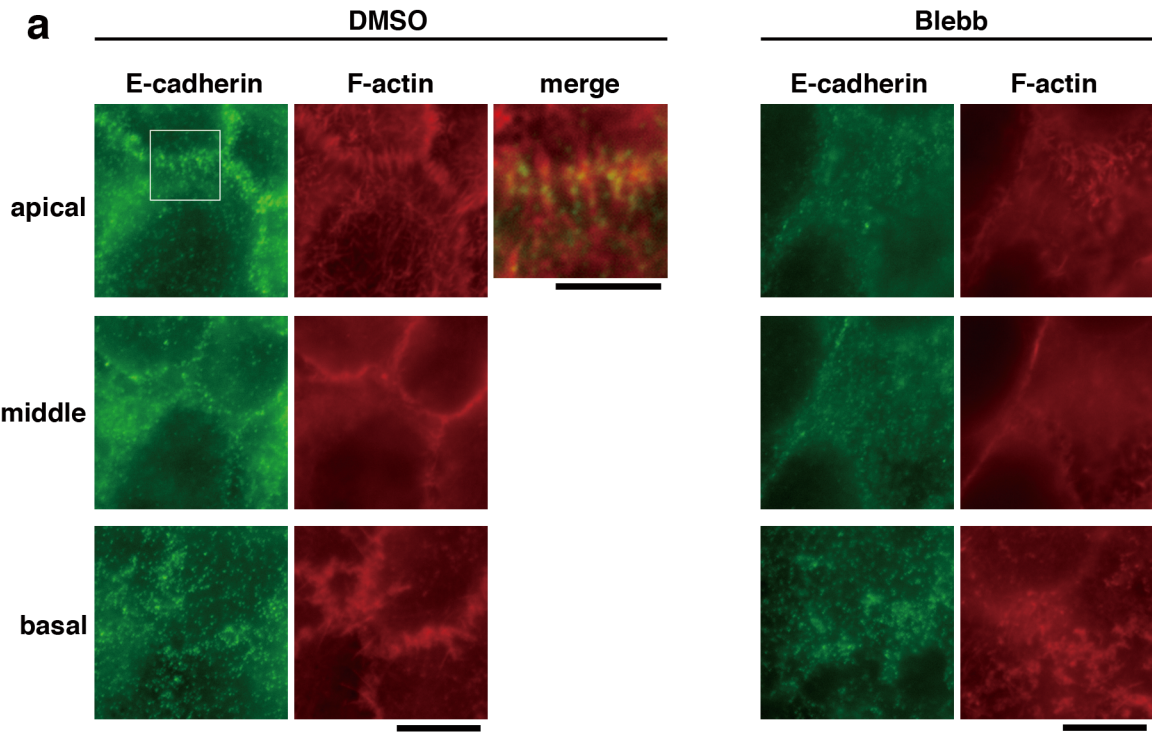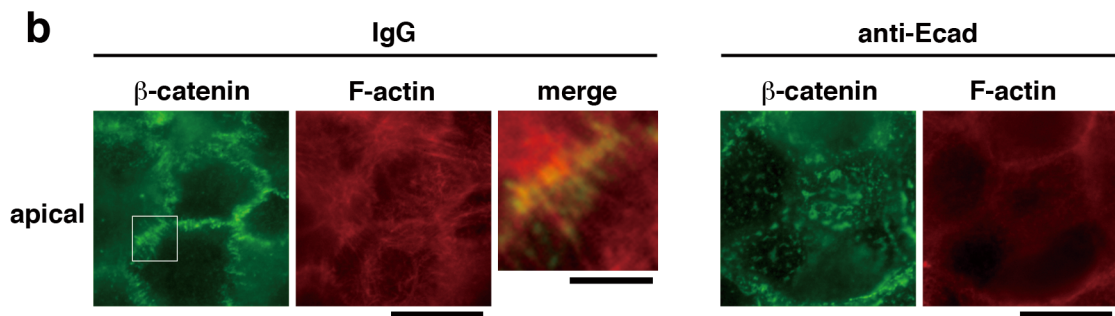

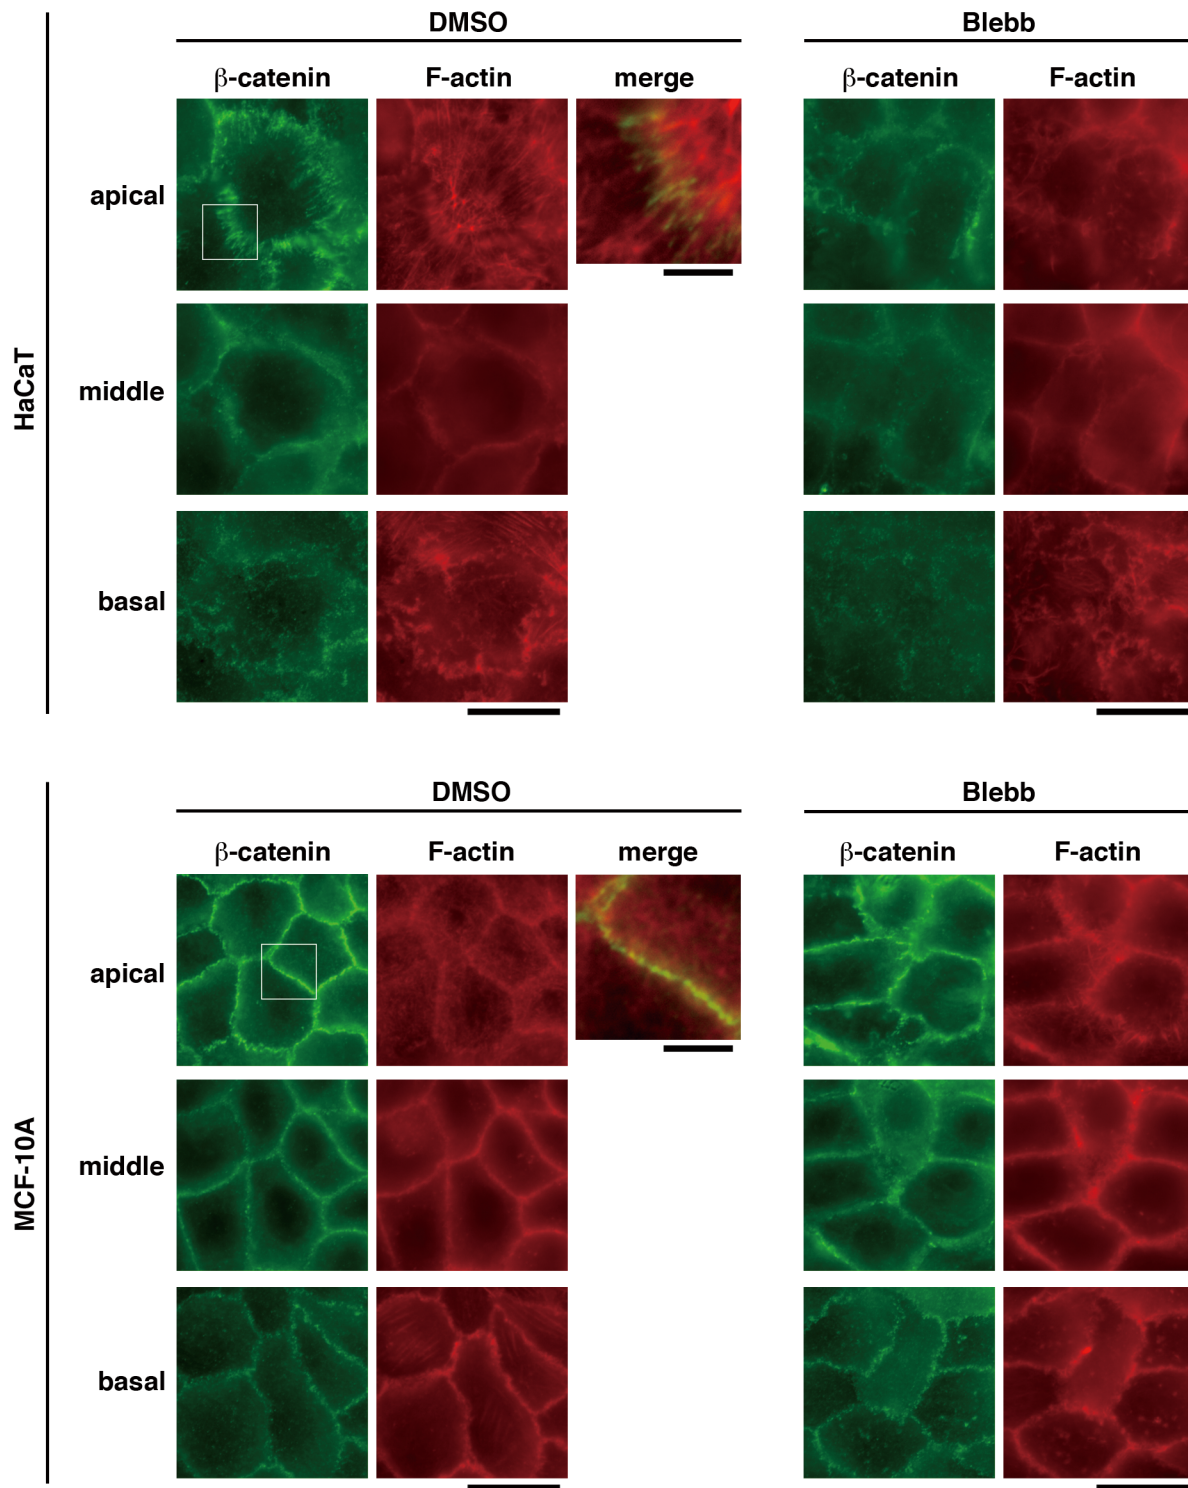

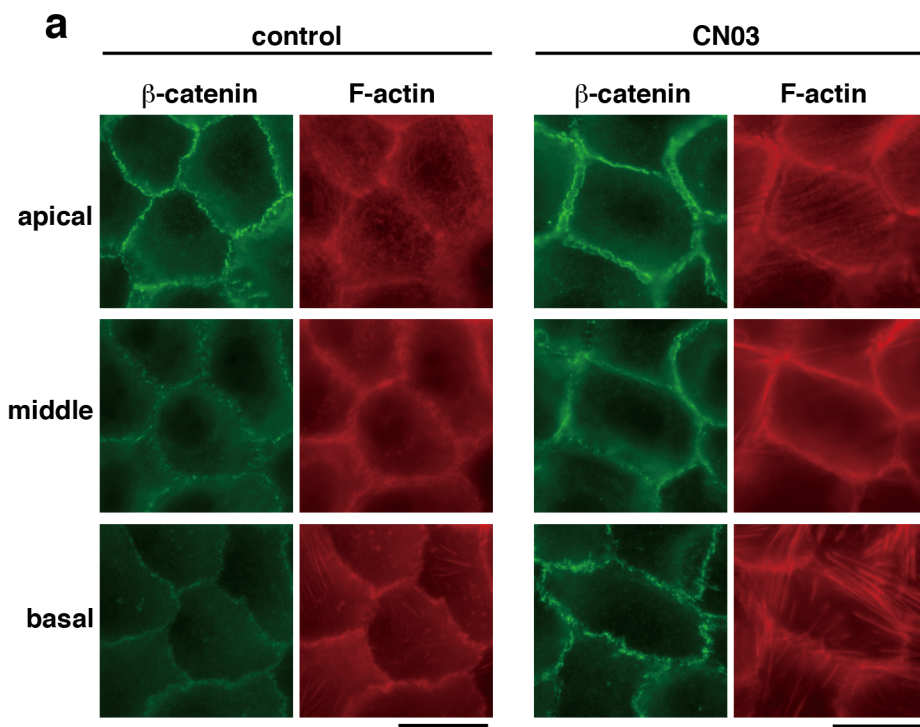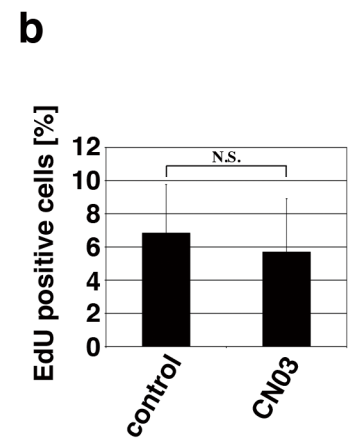

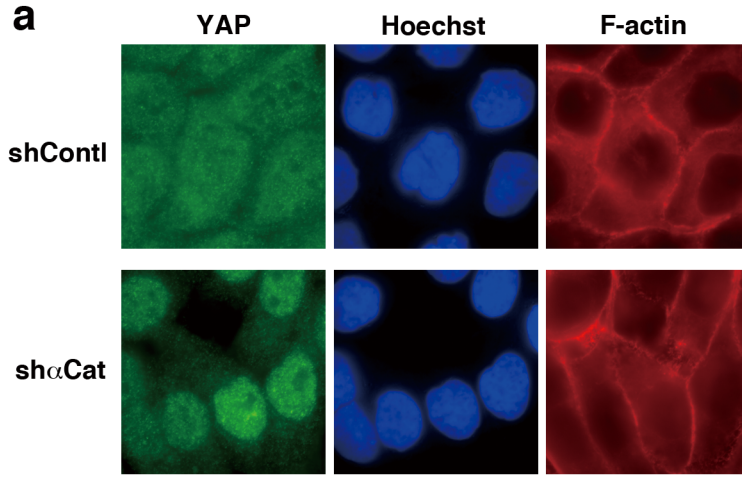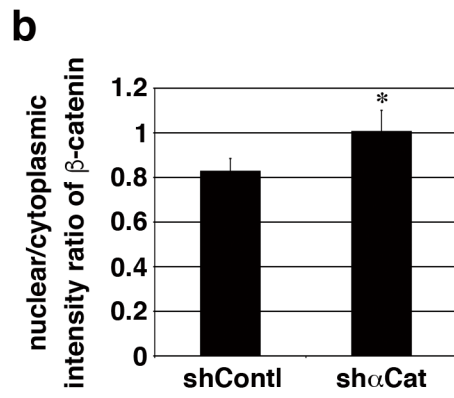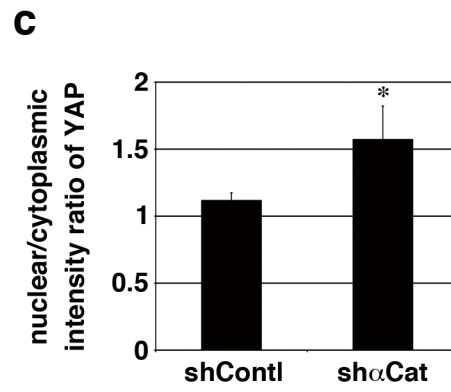

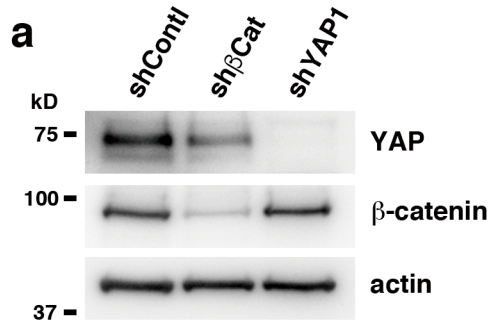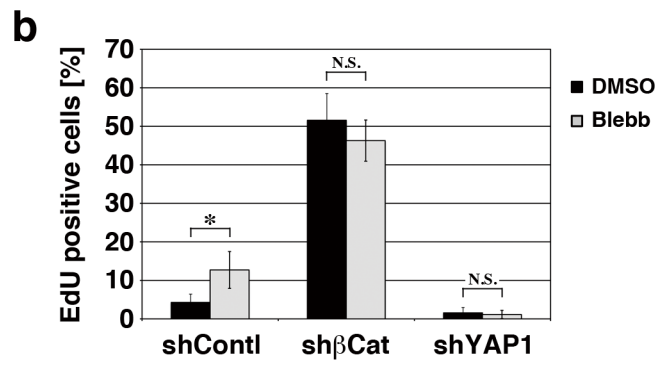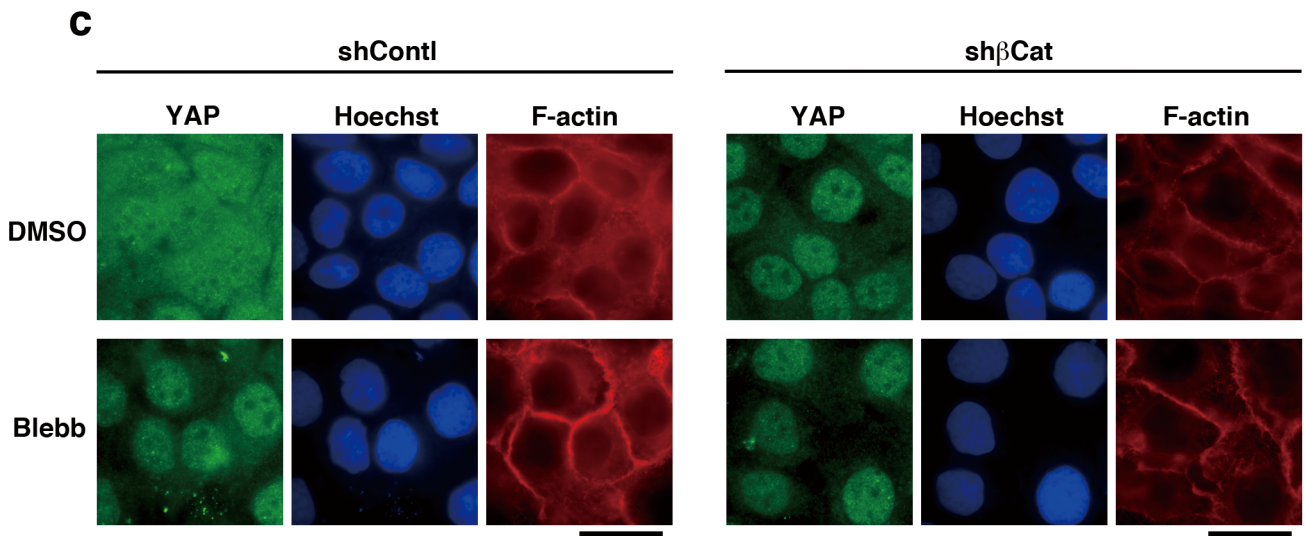

**a**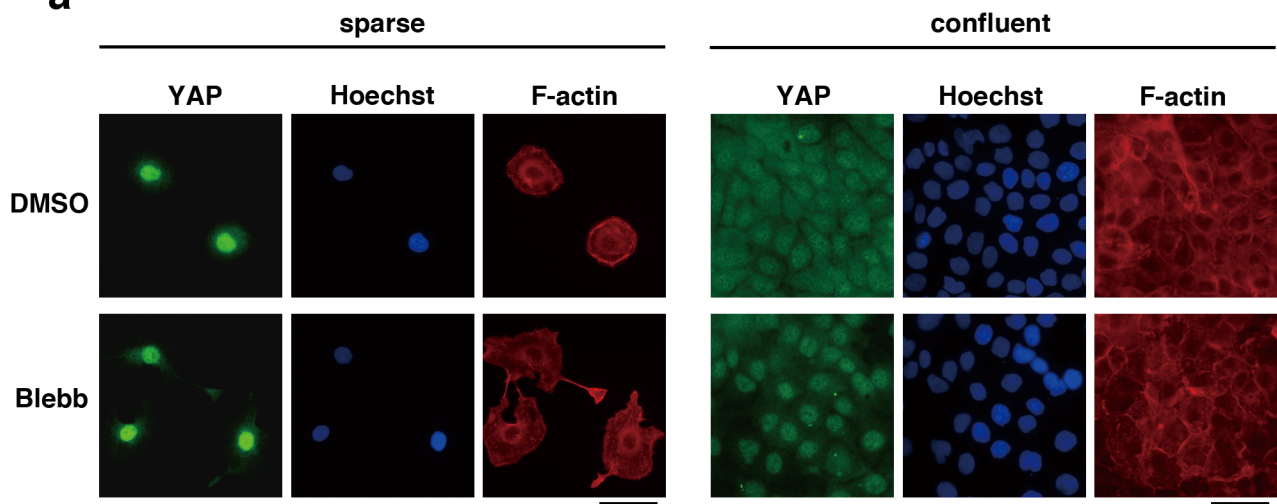**b**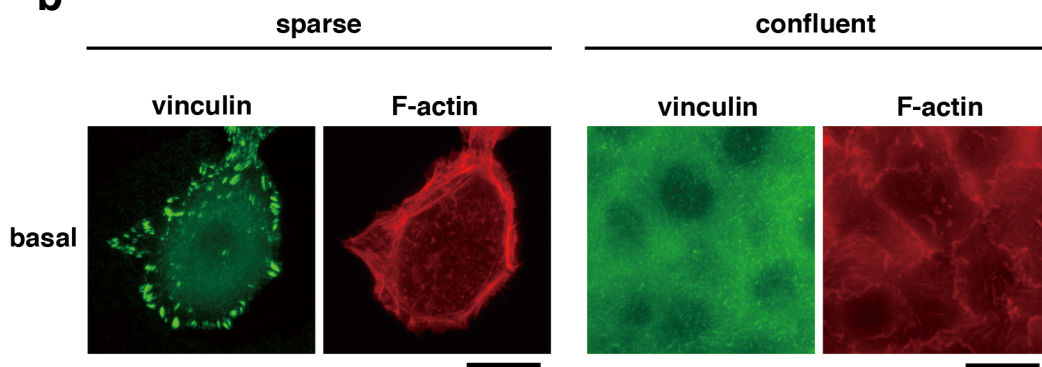

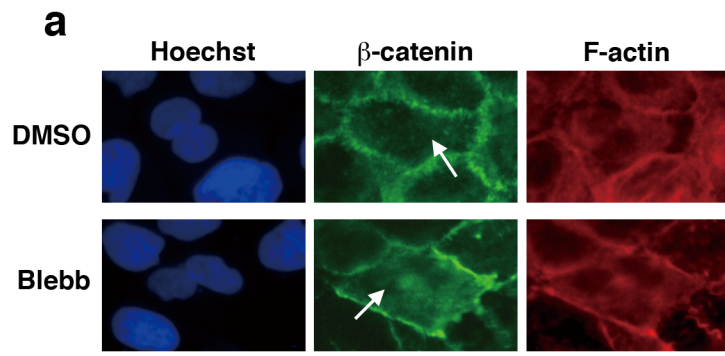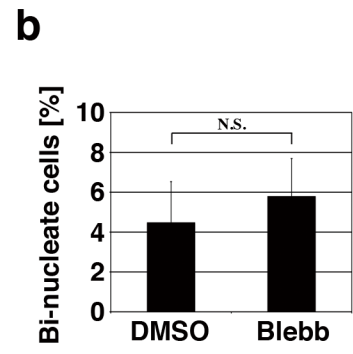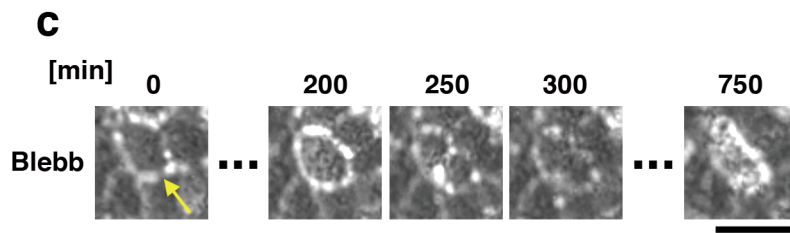

Supplement: srep46326-s1.pdf [file srep46326-s1.pdf]
